# Supplementary material
Source: bioRxiv or medRxiv preprint supplement (https://www.biorxiv.org/highwire/filestream/86441/field_highwire_adjunct_files/1/090795-10.pdf)
Supplement: Supplementary file [file 090795-10.pdf]

# KEGG

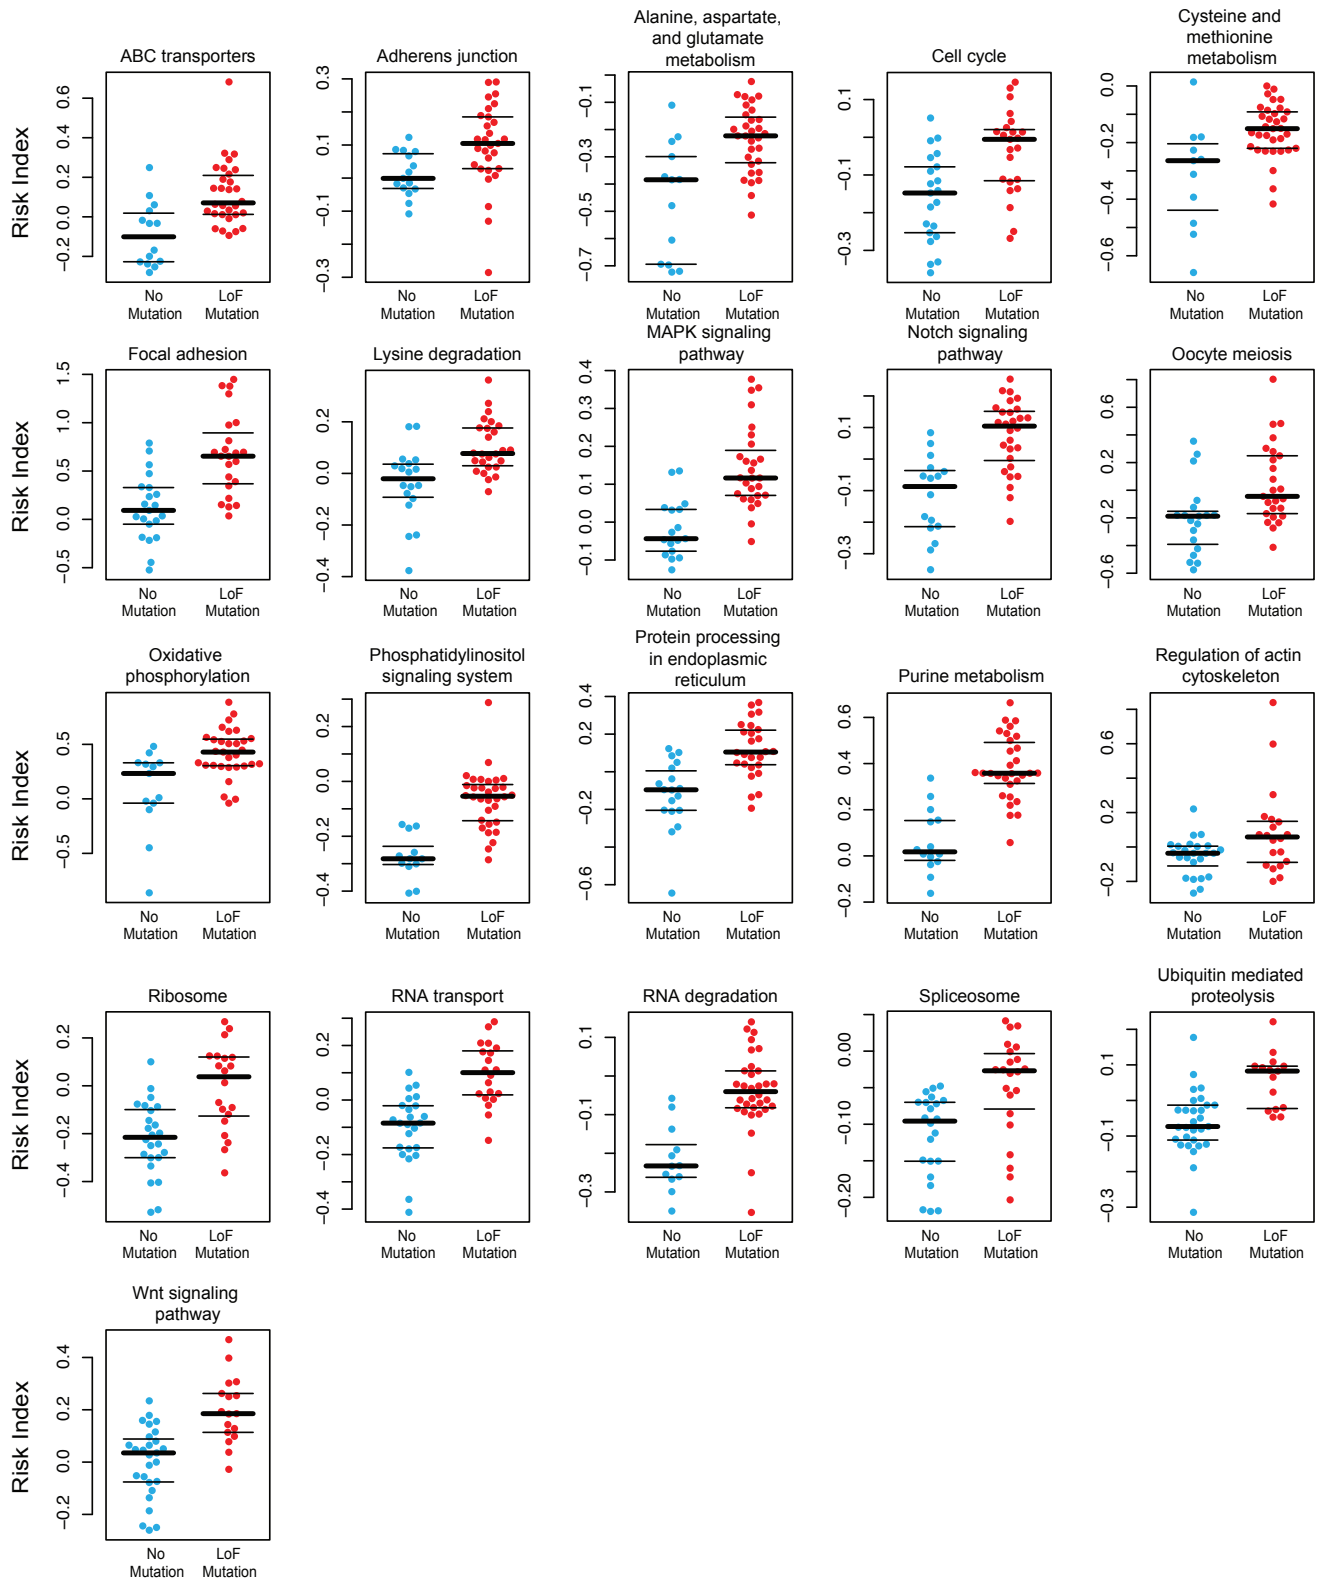

S8 Fig. LoF mutations in KEGG pathways can be predicted using a risk index as a classifier (y-axis).
